# Supplementary material for: Adsorption of organic contaminants of emerging concern using microalgae-derived hydrochars
Source: Springer Nature journal article supplement (doi:10.1038/s41598-025-92717-y), 2025-03-17
Supplement: MOESM1 [file 41598_2025_92717_MOESM1_ESM.pdf]

## **Supplementary information**

### **Adsorption of organic contaminants of emerging concern using microalgae-derived hydrochars**

Ivan Kozyatnyk<sup>1,2</sup>, Veronica Benavente<sup>1,3</sup>, Eva Weidemann<sup>1</sup>, Stina Jansson<sup>1, \*</sup>

<sup>1</sup> Department of Chemistry, Umeå University, Linnaeus väg 6, SE-901 87 Umeå, Sweden

<sup>2</sup> Department of Health, Medicine and Caring sciences, Unit of Clinical Medicine, Occupational and Environmental Medicine,  
Linköping University, 581 83 Linköping, Sweden

<sup>3</sup> RISE Processum AB, Hörneborgsvägen 10, SE-891 22 Örnsköldsvik, Sweden

\*Corresponding Author

The Supplementary Information contains one figure, Figure S1, accompanied with an in-depth discussion of the nitrogen adsorption-desorption isotherm, and one table, Table S1, which details physiochemical properties of the CEC used in this study.

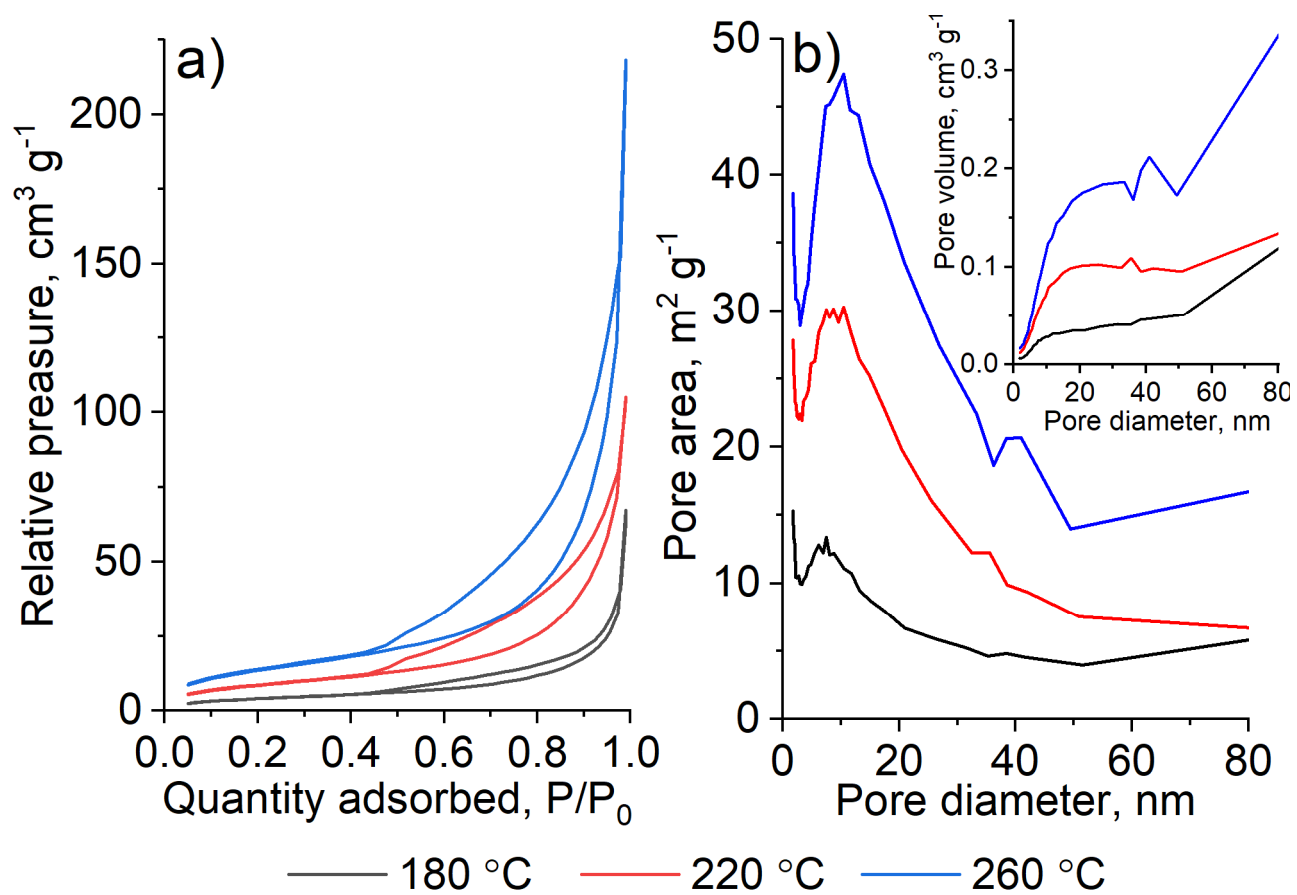

**Fig. S1.** Nitrogen adsorption-desorption isotherm (a) and pore area and volume distribution (b) of microalgae hydrochars

The nitrogen adsorption-desorption isotherm of the resulting microalgae hydrochars exhibits type II isotherms, reflecting a reversible adsorption-desorption process (see Fig. S1). This behaviour, characterized by vigorous adsorption at relative pressures near unity, is typical for gases undergoing physisorption on nonporous or macroporous adsorbents, and can be ascribed to the capillary condensation of nitrogen in the substantial voids of the macropores. Hysteresis loops were observed in the relative pressure range of 0.45 to 0.99 for all hydrochars, demonstrating type H3 characteristics. This type of hysteresis loop is frequently associated with non-rigid conglomerates of plate-like particles. However, it can also occur when the pore network is composed of macropores or large mesopores that lack pore condensate [1]. A noticeable increase in the hysteresis loop area for hydrochars created at higher temperatures suggests a growing presence of mesopores, as evidenced by the pore size distribution curve of the algae hydrochars (Fig. S1). A broad pore size distribution was observed within the mesopore region, ranging from 10 to 50 nm, and peaking at 10 nm. Interestingly, the proportion of pores with a 10 nm diameter increase covaries with increasing HTC processing temperature.

**Table S1.** Properties of studied organic compounds

| Property                                       | Database              | Caffeine                                                                          | Chloram-phenicol                                                                  | Trimetho-prim                                                                       | Carba-mazepine                                                                      | Bisphenol A                                                                         | Diclofenac                                                                          | Triclosan                                                                           |
|------------------------------------------------|-----------------------|-----------------------------------------------------------------------------------|-----------------------------------------------------------------------------------|-------------------------------------------------------------------------------------|-------------------------------------------------------------------------------------|-------------------------------------------------------------------------------------|-------------------------------------------------------------------------------------|-------------------------------------------------------------------------------------|
| Structure                                      | ChemSpider            | 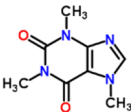 |  |  |  |  |  |  |
| Molecular Weight, g/mol                        | PubChem               | 194.194                                                                           | 323.126                                                                           | 290.323                                                                             | 236.274                                                                             | 228.291                                                                             | 296.147                                                                             | 289.536                                                                             |
| Molar Volume, cm <sup>3</sup>                  | ChemSpider (ACD/Labs) | 133.4                                                                             | 208.8                                                                             | 231.9                                                                               | 186.6                                                                               | 199.6                                                                               | 206.8                                                                               | 194.3                                                                               |
| Hydrogen Bond Donor Count                      | PubChem               | 0                                                                                 | 5                                                                                 | 2                                                                                   | 1                                                                                   | 2                                                                                   | 2                                                                                   | 1                                                                                   |
| Hydrogen Bond Acceptor Count                   | PubChem               | 3                                                                                 | 5                                                                                 | 7                                                                                   | 1                                                                                   | 2                                                                                   | 3                                                                                   | 2                                                                                   |
| Rotatable Bond Count                           | ChemSpider (ChemAxon) | 0                                                                                 | 6                                                                                 | 5                                                                                   | 0                                                                                   | 2                                                                                   | 4                                                                                   | 2                                                                                   |
| Number of Rings                                | ChemSpider (ChemAxon) | 2                                                                                 | 1                                                                                 | 2                                                                                   | 3                                                                                   | 2                                                                                   | 2                                                                                   | 2                                                                                   |
| Topological Polar Surface Area, Å <sup>2</sup> | PubChem               | 58.4                                                                              | 115                                                                               | 106                                                                                 | 46.3                                                                                | 40.5                                                                                | 49.3                                                                                | 29.5                                                                                |
| Boiling Point, °C                              | PubChem               | 178                                                                               | 644.9                                                                             | 526                                                                                 | 411                                                                                 | 360.5                                                                               | 412                                                                                 | 120                                                                                 |
| Melting Point                                  | PubChem               | 237                                                                               | 150.5                                                                             | 202                                                                                 | 190.2                                                                               | 153                                                                                 | 284                                                                                 | 57                                                                                  |
| Density, g/cm <sup>3</sup>                     | PubChem               | 1.23                                                                              | 1.5                                                                               | 1.3                                                                                 | 1.3                                                                                 | 1.2                                                                                 | 1.4                                                                                 | 1.5                                                                                 |
| Vapor Pressure, mm Hg                          | PubChem               | 0.0000009                                                                         | 1.73E-12                                                                          | 0                                                                                   | 0.000000184                                                                         | 0.00000004                                                                          | 6.14E-08                                                                            | 0.0000046                                                                           |
| Water Solubility, mg/L                         | PubChem               | 21600                                                                             | 2500                                                                              | 400                                                                                 | 17.7                                                                                | 300                                                                                 | 2.37                                                                                | 10                                                                                  |
| LogS                                           | PubChem               | -0.97                                                                             | -2.11                                                                             | -2.86                                                                               | -3.2                                                                                | -3.4                                                                                | -4.8                                                                                | -4.7                                                                                |
| pKa (Strongest Acidic)                         | ChemSpider (ChemAxon) |                                                                                   | 7.49                                                                              | 17.33                                                                               | 15.96                                                                               | 9.78                                                                                | 4                                                                                   | 7.68                                                                                |
| pKa (Strongest Basic)                          | ChemSpider (ChemAxon) | -0.92                                                                             | -2.8                                                                              | 7.16                                                                                | -3.8                                                                                | -5.5                                                                                | -2.1                                                                                | -6.7                                                                                |
| Dissociation Constant pKa                      | PubChem               | 14                                                                                | 9.75                                                                              | 7.12                                                                                | 13.9                                                                                | 9.6                                                                                 | 4.15                                                                                | 7.9                                                                                 |
| Kovats Retention Index                         | PubChem               | 1760                                                                              | 2310                                                                              | 2645                                                                                | 2296                                                                                | 2108                                                                                | 2495                                                                                | 2114                                                                                |
| Henrys Law Constant, atm-m <sup>3</sup> /mole  | ChemSpider (EPISuite) | 7.116E-13                                                                         | 1.915E-15                                                                         | 2.39E-014                                                                           | 1.549E-09                                                                           | 3.948E-10                                                                           | 5.296E-09                                                                           | 3.834E-07                                                                           |

| Property                                        | Database              | Caffeine | Chloram-phenicol | Trimetho-prim | Carba-mazepine | Bisphenol A | Diclofenac | Triclosan |
|-------------------------------------------------|-----------------------|----------|------------------|---------------|----------------|-------------|------------|-----------|
| Log Octanol-Water                               | PubChem               | -0.07    | 1.02             | 0.91          | 2.673          | 3.431       | 4.058      | 4.76      |
| Log Octanol-Air                                 | ChemSpider (EPISuite) | 8.765    | 17.169           | 12.920        | 10.805         | 12.747      | 14.224     | 11.45     |
| Soil Adsorption Coefficient Log K <sub>oc</sub> | ChemSpider (EPISuite) | 1        | 1                | 2.957         | 3.588          | 4.876       | 2.921      | 4.265     |
| Distribution coefficient Log D (pH 7.4)         | ChemSpider (ACD/Labs) | 0.28     | 1.02             | 1.00          | 2.28           | 3.63        | 1.17       | 5.13      |
| Polarizability, cm <sup>3</sup>                 | ChemSpider (ACD/Labs) | 2E-23    | 2.88E-23         | 3.18E-23      | 2.76E-23       | 2.7E-23     | 3.03E-23   | 2.75E-23  |
| Surface Tension, dyne/cm                        | ChemSpider (ACD/Labs) | 55.8     | 66.1             | 53.9          | 57.3           | 46          | 58         | 51.7      |

## References

[1] Thommes, M., Kaneko, K., Neimark, A.V., Olivier, J.P., Rodriguez-Reinoso, F., Rouquerol, J. and Sing, K.S.W. 2015. Physisorption of gases, with special reference to the evaluation of surface area and pore size distribution (IUPAC Technical Report). Pure Appl. Chem. 87(9-10), 1051-1069.
